# Supplementary material for: Investigating lytic polysaccharide monooxygenase-assisted wood cell wall degradation with microsensors
Source: PubMed Central journal article supplement (PMC9586961; doi:10.1038/s41467-022-33963-w), 2022-10-21
Supplement: 41467_2022_33963_MOESM1_ESM.pdf [file 41467_2022_33963_MOESM1_ESM.pdf]

## **SUPPLEMENTARY INFORMATION FOR**

### **Investigating Lytic Polysaccharide Monooxygenase-assisted wood cell wall degradation with microsensors**

Hucheng Chang<sup>1</sup>, Neus Gacias Amengual<sup>1</sup>, Alexander Botz<sup>1</sup>, Lorenz Schwaiger<sup>1</sup>, Daniel Kracher<sup>1,2</sup>, Stefan Scheiblbrandner<sup>1</sup>, Florian Csarman<sup>1</sup>, Roland Ludwig<sup>1\*</sup>

<sup>1</sup> Department of Food Science and Technology, Institute of Food Technology, University of Natural Resources and Life Sciences, Vienna, Muthgasse 18, 1190 Vienna, Austria.

<sup>2</sup> Present Address: Institute of Molecular, Graz University of Technology, Petersgasse 14, 8010 Graz, Austria.

\* Corresponding author: Roland Ludwig. Email: roland.ludwig@boku.ac.at

#### **This file includes:**

Supplementary Figures 1–8

Supplementary Tables 1–2

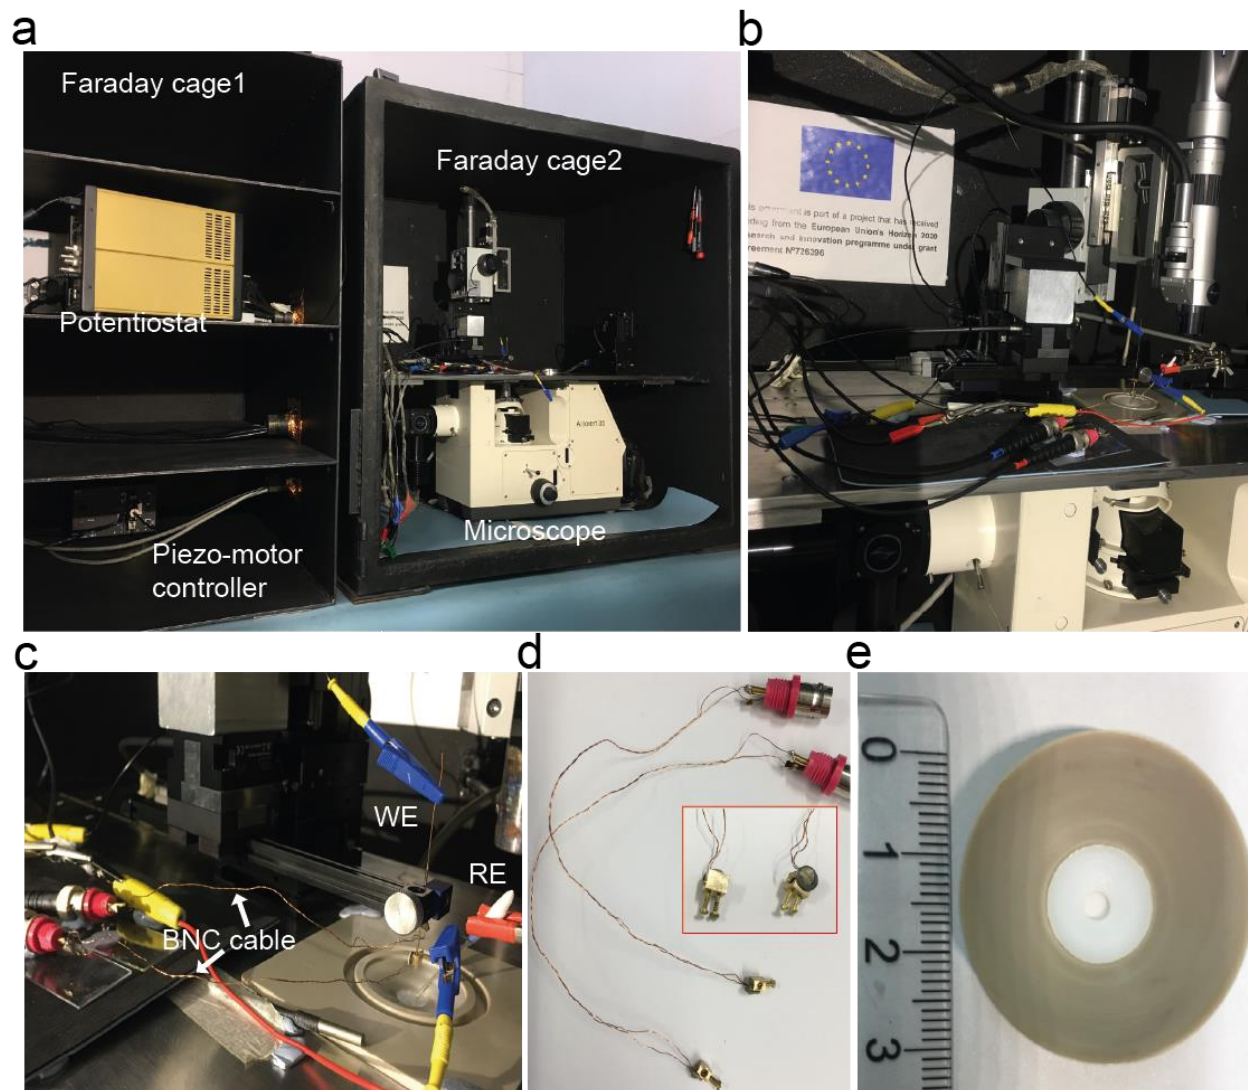

**Supplementary Figure 1. The experimental setup of the SECM system.** (a) A potentiostat and a micromanipulator controller placed in a Faraday cage. A micromanipulator, a sample holder (electrochemical cell), the top digital microscope and the inverted optical microscope are placed in the second Faraday cage. The micromanipulator is placed on the level stainless-steel board, and the circle sample holder is inlaid in the middle hole of this stainless-steel board. The distance (b) and close (c) view of the two-electrode electrochemical setup and the circle sample holder as an electrochemical cell. A micro(bio)sensor mounted on the cantilever of the micromanipulator is used as a working electrode, and a miniaturized Ag|AgCl is used as reference and counter electrode. (d) The combination of a piezo ceramic plate and a brass holder is connected with cables. (e) The circle sample holder ( $\text{\O} = 32 \text{ mm}$ ) with an embedded Teflon ring ( $\text{\O}_{\text{out}} = 12 \text{ mm}$ ,  $\text{\O}_{\text{in}} = 3 \text{ mm}$ ), serves as an electrochemical cell.

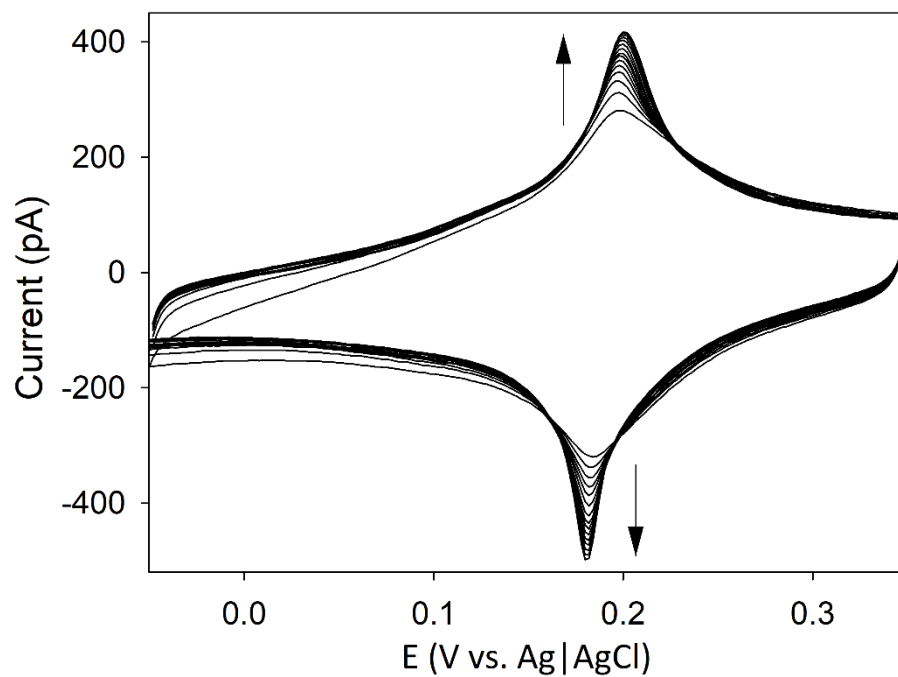

**Supplementary Figure 2. Electrochemical activation of Prussian blue film.** Cyclic voltammograms during electrochemical activation of the Prussian blue on a Pt ultramicroelectrode at a scan rate of 50 mV s<sup>-1</sup> in 0.1 M HCl with 0.1 M KCl. The arrows showed the trend of current peak change with continued scanning (15 cycles). The scanning was started at -0.05 V.

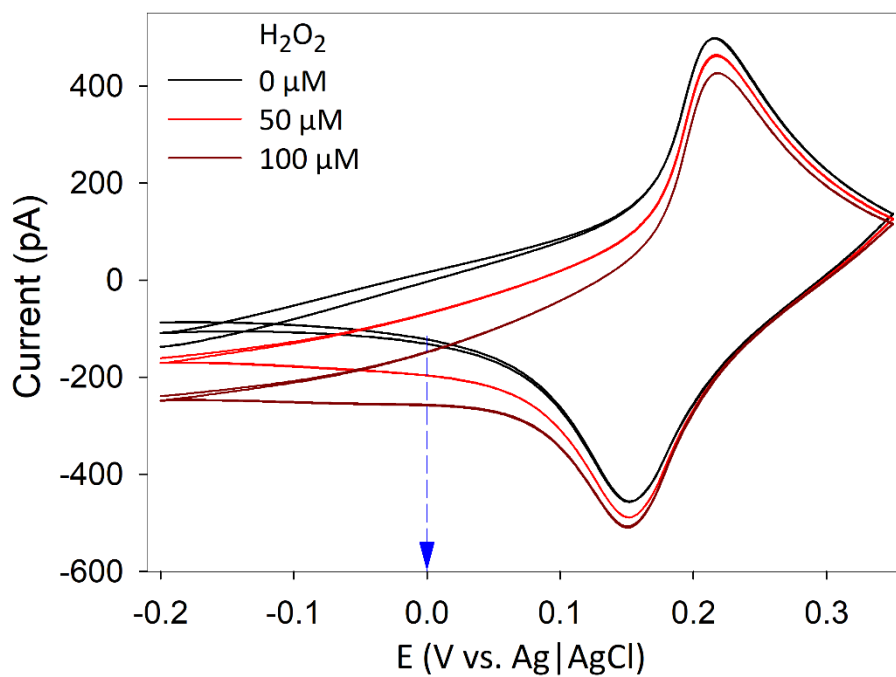

**Supplementary Figure 3. Voltammetry characterization of an H<sub>2</sub>O<sub>2</sub> microsensor.** Cyclic voltammograms of a Prussian blue modified Pt ultramicroelectrode in 50 mM air-saturated acetate buffer, pH 5.5 in the absence (black line) and presence of 50 (red line) or 100 μM (dark red line) H<sub>2</sub>O<sub>2</sub>. The scan rate is 50 mV s<sup>-1</sup>. The blue arrow indicates the potential (0.0 V) selected for all amperometric measurements using H<sub>2</sub>O<sub>2</sub> microsensors.

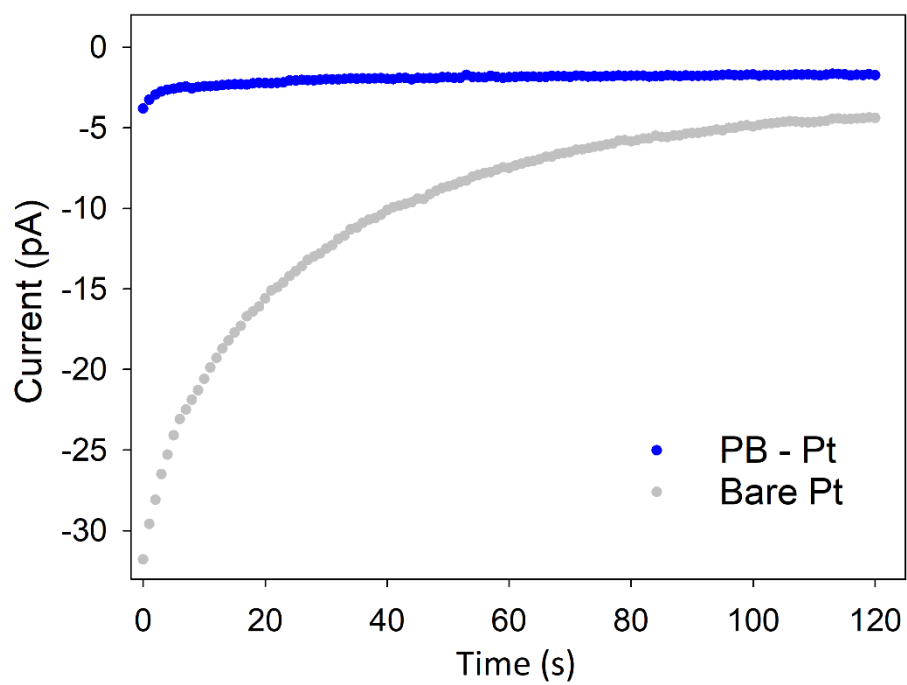

**Supplementary Figure 4. Low activity of the Prussian blue for reducing O<sub>2</sub>.** Amperometric response of a Prussian blue modified (blue dots) and a bare (gray dots) Pt ultramicroelectrode in 50 mM air-saturated acetate buffer, pH 5.5 at an applied potential of 0.0 V vs. Ag|AgCl.

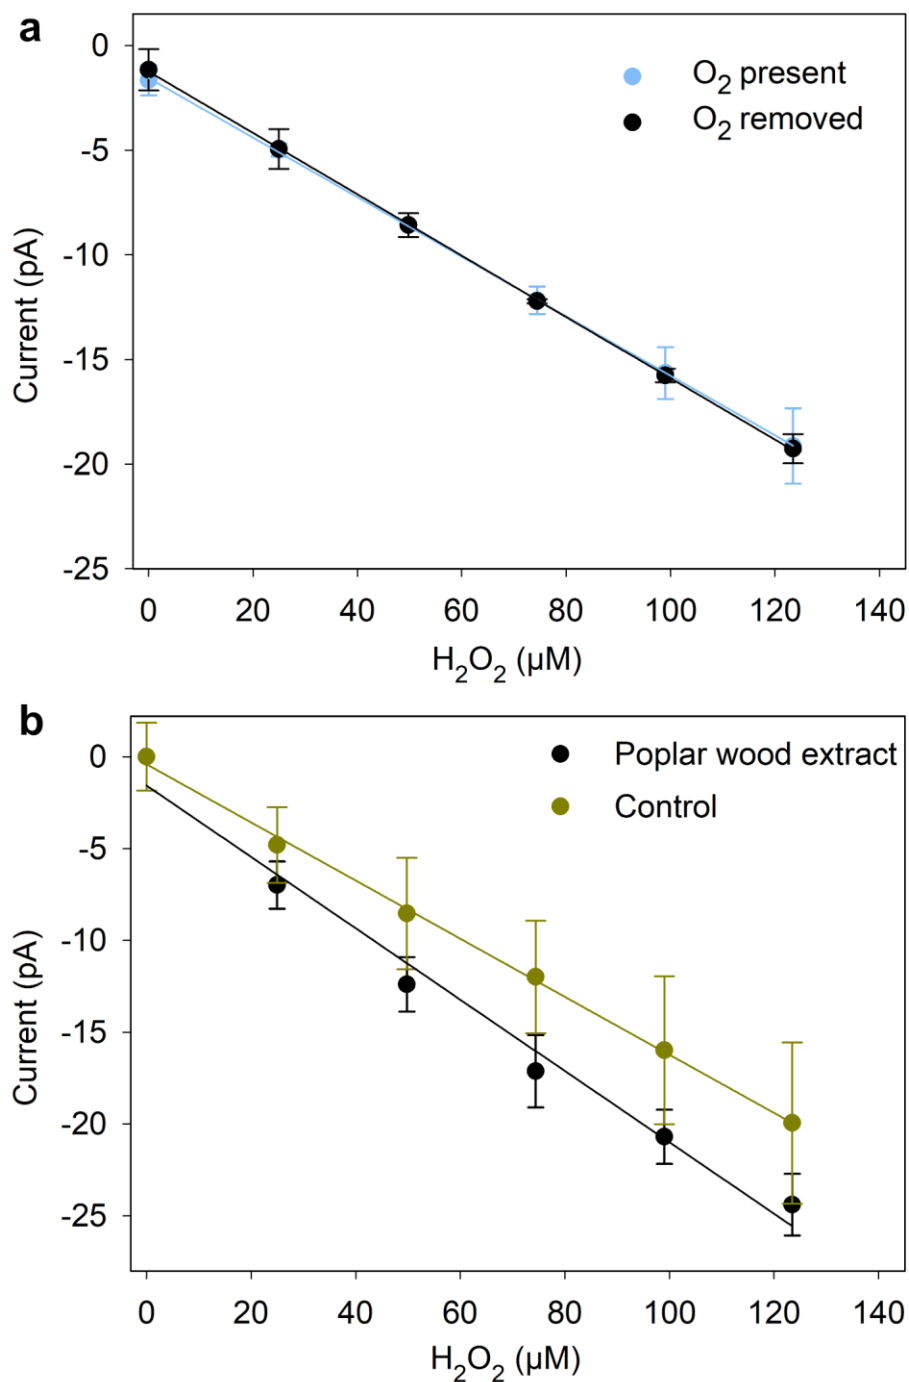

**Supplementary Figure 5. Test the interference effect of O<sub>2</sub> and poplar wood extract on the H<sub>2</sub>O<sub>2</sub> microsensors.** **a** Calibration plots of H<sub>2</sub>O<sub>2</sub> microsensors in 50 mM sodium acetate buffer, pH 5.5, in the presence (light blue: 0.142 μA μM<sup>-1</sup>) and absence (black: 0.147 μA μM<sup>-1</sup>) of O<sub>2</sub>. **b** Calibration plots of H<sub>2</sub>O<sub>2</sub> microsensors in 50 mM sodium acetate buffer, pH 5.5, in the presence (dark green: 0.158 μA μM<sup>-1</sup>) and absence (black: 0.194 μA μM<sup>-1</sup>) of poplar wood extract. Data in panels (a) and (b) are shown as mean values, and error bars show SD (n = 3, independent experiments). Extraction was performed for 16 h in ultrapure water at 22 °C using 20 % (w/w) freshly ground powder obtained from debarked poplar wood (particle size < 250 μm) and the solution was clarified by filtration prior to use.

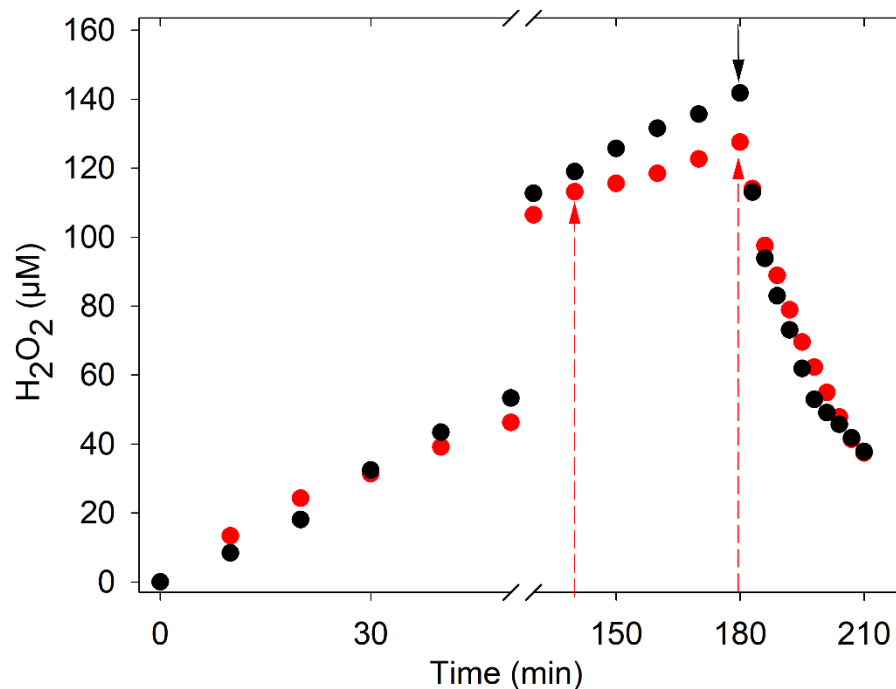

**Supplementary Figure 6. The effect of reductant *N. crassa* CDHIIA on the localized H<sub>2</sub>O<sub>2</sub> concentration.** *C. hotsonii* CDH (1 µM) and 2 mg mL<sup>-1</sup> cellobiohydrolases were applied for continual production of H<sub>2</sub>O<sub>2</sub> during the whole time-course. The red arrows indicate the addition of LPMO and *Nc*CDHIIA in sequence, and the black arrow indicates the addition of LPMO and *Nc*CDHIIA together.

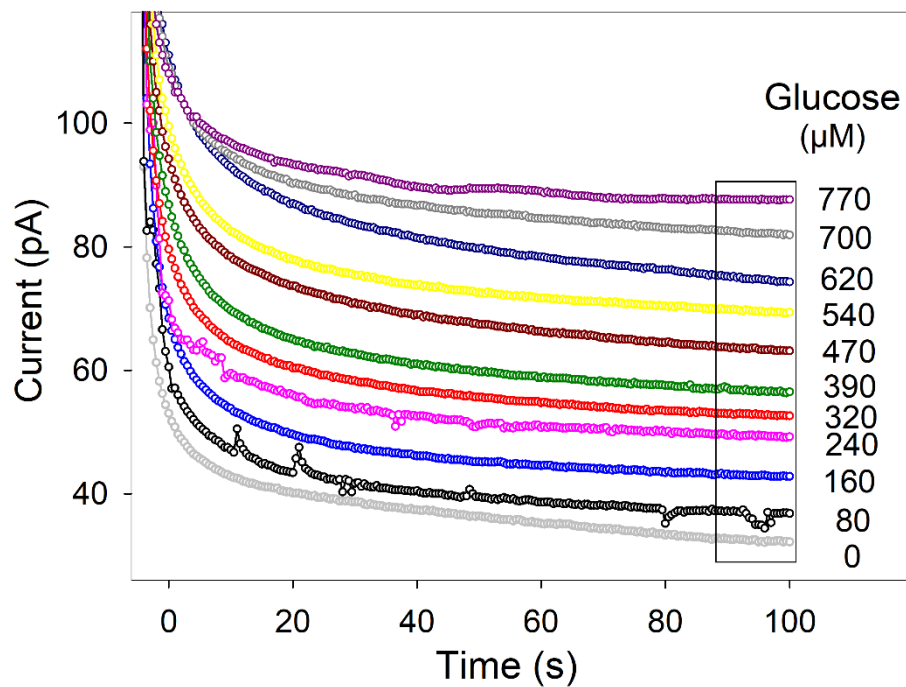

**Supplementary Figure 7. Characterization of glucose microbiosensors.** Amperometric response of a glucose microbiosensor to varying concentrations of glucose measured in 50 mM phosphate buffer solution of pH 6.0, at an applied potential of 0.55 V vs. Ag|AgCl.



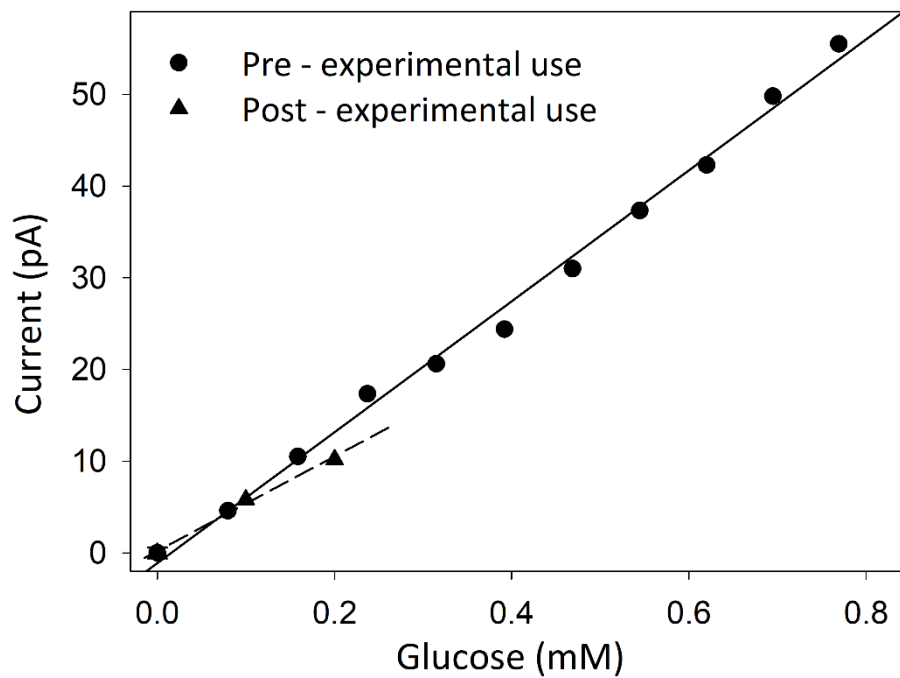

**Supplementary Figure 8. Stability of glucose microbiosensors.** Calibration plots of a glucose microbiosensor in Supplementary Figure 6 before (sensitivity:  $71.4 \text{ pA mM}^{-1}$ ) and after (sensitivity:  $51.0 \text{ pA mM}^{-1}$ ) 2 h of experimental use.

**Supplementary Table 1. Analytical parameters of three independent H<sub>2</sub>O<sub>2</sub> microsensors.** The amperometric measurements were performed in 50 mM sodium acetate buffer, pH 5.5, at 20 °C in the presence of different concentrations of H<sub>2</sub>O<sub>2</sub>.

| Parameter                                             | Sensor 1 | Sensor 2 | Sensor 3 | Average                  |
|-------------------------------------------------------|----------|----------|----------|--------------------------|
| Sensitivity [pA $\mu\text{M}^{-1}$ ]                  | 0.093    | 0.088    | 0.083    | <b>0.088</b> $\pm$ 0.005 |
| Electrode diameter [ $\mu\text{m}$ ]                  | 1.13     | 1.27     | 1.22     | <b>1.21</b> $\pm$ 0.07   |
| Electrode area [ $\mu\text{m}^2$ ]                    | 1.00     | 1.26     | 1.17     | <b>1.15</b> $\pm$ 0.13   |
| Sensitivity [pA $\mu\text{M}^{-1} \mu\text{m}^{-2}$ ] | 0.093    | 0.069    | 0.071    | <b>0.078</b> $\pm$ 0.130 |
| Noise [pA]                                            | 0.19     | 0.15     | 0.14     | <b>0.16</b> $\pm$ 0.03   |
| Limit of detection LOD [ $\mu\text{M}$ ]              | 6.3      | 5.2      | 5.0      | <b>5.5</b> $\pm$ 0.7     |
| Limit of quantitation LOQ [ $\mu\text{M}$ ]           | 21.0     | 17.3     | 16.7     | <b>18.3</b> $\pm$ 2.3    |
| Linear range [ $\mu\text{M}$ ]                        | 25–200   | 25–200   | 25–200   | <b>25–200</b>            |
| Correlation coefficient $R^2$                         | 0.998    | 0.999    | 0.999    | -                        |

**Supplementary Table 2. Analytical parameters of three independent glucose microbiosensors.** The amperometric measurements were performed in 50 mM potassium phosphate buffer, pH 6.0, at 20 °C in the presence of different concentrations of glucose.

| Parameter                                             | Sensor 1 | Sensor 2 | Sensor 3 | Average                  |
|-------------------------------------------------------|----------|----------|----------|--------------------------|
| Sensitivity [pA $\mu\text{M}^{-1}$ ]                  | 0.064    | 0.045    | 0.043    | <b>0.051</b> $\pm$ 0.012 |
| Electrode diameter [ $\mu\text{m}$ ]                  | 1.50     | 1.42     | 1.56     | <b>1.50</b> $\pm$ 0.07   |
| Electrode area [ $\mu\text{m}^2$ ]                    | 1.77     | 1.58     | 1.91     | <b>1.75</b> $\pm$ 0.16   |
| Sensitivity [pA $\mu\text{M}^{-1} \mu\text{m}^{-2}$ ] | 0.036    | 0.029    | 0.023    | <b>0.029</b> $\pm$ 0.007 |
| Noise [pA]                                            | 0.22     | 0.24     | 0.2      | <b>0.22</b> $\pm$ 0.02   |
| Limit of detection LOD [ $\mu\text{M}$ ]              | 10.3     | 16.0     | 14.0     | <b>13.4</b> $\pm$ 2.9    |
| Limit of quantitation LOQ [ $\mu\text{M}$ ]           | 34.3     | 53.3     | 46.7     | <b>44.8</b> $\pm$ 9.6    |
| Linear range [ $\mu\text{M}$ ]                        | 80–400   | 80–400   | 80–400   | <b>80–400</b>            |
| Correlation coefficient $R^2$                         | 0.988    | 0.992    | 0.993    | -                        |
